# Supplementary material for: Strategies for interface issues and challenges of neural electrodes
Source: Royal Society of Chemistry journal article supplement (doi:10.1039/d1nr07226a), 2022-01-01
Supplement: d1nr07226a1.pdf [file d1nr07226a1.pdf]

## Supporting Information

### Strategies for Interface Issues and Challenges of Neural Electrodes

Cuiyuan Liang,<sup>a</sup> Yan Liu,<sup>a\*</sup> Weihong Lu,<sup>a</sup> Gongwei Tian,<sup>a</sup> Qinyi Zhao,<sup>a</sup> Dan Yang,<sup>a</sup> Jing Sun,<sup>a</sup> and Dianpeng Qi<sup>a\*</sup>

a. National and Local Joint Engineering Laboratory for Synthesis, Transformation and Separation of Extreme Environmental Nutrients; MIIT Key Laboratory of Critical Materials Technology for New Energy Conversion and Storage, School of Chemistry and Chemical Engineering, Harbin Institute of Technology, Harbin 150001, P. R. China.

\*Corresponding authors: Dianpeng Qi (E-mail: [dpqi@hit.edu.cn](mailto:dpqi@hit.edu.cn)) and Yan Liu (E-mail: [liyuan1986@hit.edu.cn](mailto:liyuan1986@hit.edu.cn))

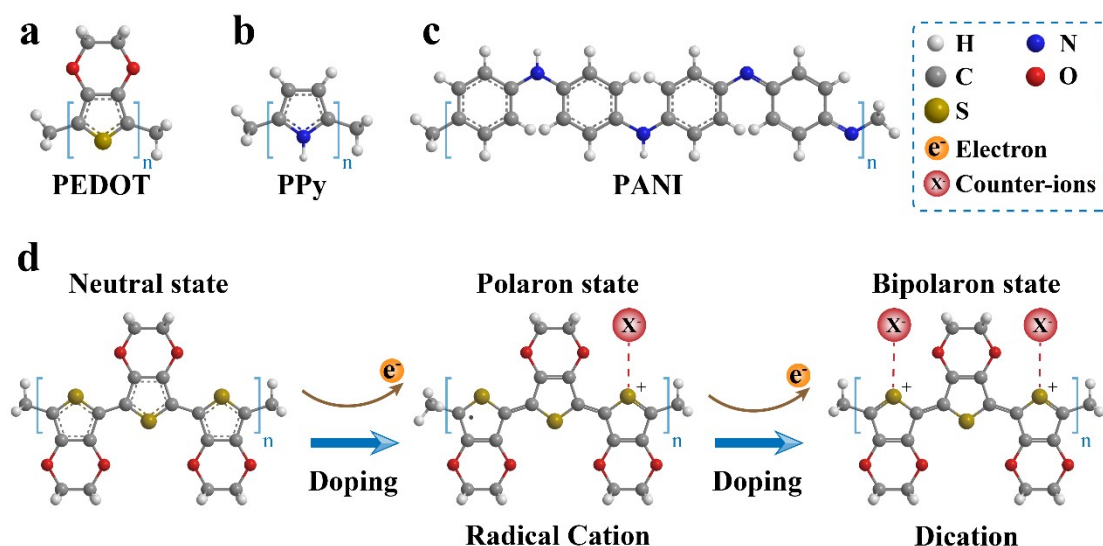

**Fig. S1.** Schematic representation of common conductive polymers (a) PEDOT, (b) PPy, and (c) PANI, diagram of (d) polymer conductivity mechanism (PEDOT as an example).

The electron conductivity of conductive polymers is derived from the delocalization of  $\pi$  bond electrons on the conjugated backbone structure. The ionic dopant (e.g., PSS in PEDOT:PSS, and tosylate (Tos) in PEDOT:Tos)<sup>1, 2</sup> can make the conductive polymer generate free radicals to form a polaron when paired with the dopant, and then be further oxidized to a bipolaron. Thereby generating additional electrons or holes to enhance the conductivity of the polymer.

**Table S1.** The parameters for evaluating the electrochemical performance of neural electrodes.

| Parameters                    | Evaluation standard                                                                                                            | Refs |
|-------------------------------|--------------------------------------------------------------------------------------------------------------------------------|------|
| Charge storage capacity (CSC) | Higher CSC can transfer more charges, and thus the greater the signal strength of the stimulation.                             | 3, 4 |
| Impedance                     | Lower impedance can decrease thermal noise, which makes electrophysiological signal monitoring more detailed.                  | 5, 6 |
| Charge injection limit (CIL)  | Higher CIL can facilitate a large amount of charge transfer, which improves the ability of the electrode to stimulate neurons. | 7, 8 |

**Table S2.** the charge transfer mechanism, material, and evaluation parameters of neural electrodes.

| <b>Charge transport mechanism</b> | <b>Materials</b>          | <b>Classification of electrodes</b>                    | <b>Evaluation parameters</b>                                                                                       |
|-----------------------------------|---------------------------|--------------------------------------------------------|--------------------------------------------------------------------------------------------------------------------|
| <b>Electrons</b>                  | Metal electrode           | Nanometal electrode                                    | Impedance, charge injection limit (CIL), charge storage capacity (CSC), biocompatibility, mechanical, high density |
|                                   |                           | Composite metal electrode                              |                                                                                                                    |
| Carbon-based flexible electrode   | Graphene electrode        |                                                        |                                                                                                                    |
|                                   | Carbon nanotube electrode |                                                        |                                                                                                                    |
| <b>Ions</b>                       | Hydrogels                 | Ion conductive hydrogel                                |                                                                                                                    |
|                                   |                           | Ion-conducting organohydrogel                          |                                                                                                                    |
| <b>Electrons and ions</b>         | Conductive polymers       | Polypyrrole                                            |                                                                                                                    |
|                                   |                           | Poly (3, 4-ethylenedioxythiophene) and its derivatives |                                                                                                                    |
|                                   | Composite material        | Conductive polymers and composites                     |                                                                                                                    |
|                                   |                           | Hydrogel and composites                                |                                                                                                                    |

**Table S3.** Comparison of electrochemical parameters and preparation methods of neural electrodes.

| Material                             | Method                                     | Impedance at 1 kHz (K $\Omega$ ) | CSC <sup>a</sup> (mC/cm <sup>2</sup> ) | CIL <sup>b</sup> (mC/cm <sup>2</sup> ) | Refs |
|--------------------------------------|--------------------------------------------|----------------------------------|----------------------------------------|----------------------------------------|------|
| Pt-nanograss                         | Chemical deposition                        | 99.52                            | –                                      | 0.3                                    | 9    |
| Pt/EGaIn <sup>c</sup>                | Screen printing                            | 250 $\pm$ 40                     | -                                      | -                                      | 10   |
| Nanoporous Pt                        | Electrodeposition                          | 2.4                              | $\square \approx 1.2$                  | 3                                      | 11   |
| Au nanoparticles                     | LOR <sup>d</sup> and sputtering deposition | 0.6                              | -                                      | -                                      | 12   |
| GF <sup>e</sup> -PC <sup>f</sup> -20 | Wet spinning and coating                   | 51.47 $\pm$ 44                   | 798 $\pm$ 110                          | 8.9 $\pm$ 1.3                          | 5    |
| Graphene                             | Laser pyrolysis and chemically doped       | 0.52                             | -                                      | 3.1                                    | 13   |
| CNT array                            | Chemical vapor deposition                  | 3                                | –                                      | 1–1.6                                  | 14   |
| CNT fiber                            | Wet-spinning                               | 14.09 $\pm$ 0.3                  | 372                                    | 6.52                                   | 15   |
| PEDOT–CNT Microelectrodes            | Electropolymerization                      | 15.51 $\pm$ 1.19                 | -                                      | 1.21 $\pm$ 0.02                        | 16   |
| PEDOT-CNT nanotunnel                 | Electrospinning and electrodeposition      | 2.6 $\pm$ 0.4                    | 26.3 $\pm$ 2.4                         | -                                      | 17   |
| PEDOT/CNT                            | Electrodeposition                          | 15                               | 6                                      | 1.25                                   | 18   |
| PEDOT/PSS                            | Deposition                                 | 4                                | 123                                    | 2.92                                   | 19   |
| PPy/SWCNTs                           | Electrodeposition                          | 2.06                             | 1244                                   | 7.5                                    | 20   |
| PPy/PSS                              | Electrodeposition                          | 2.2                              | 705                                    | 5                                      | 20   |
| PPy/Cl                               | Electrodeposition                          | 2.82                             | 495                                    | 3.2                                    | 20   |
| SF <sup>g</sup> organohydrogel       | UV irradiation                             | >0.04 at 0.1-100 kHz             | -                                      | -                                      | 21   |
| GelMA <sup>h</sup> /PEDOT: PSS       | UV irradiation                             | 261 at 1Hz                       | -                                      | -                                      | 22   |
| Alg-PAAM <sup>i</sup>                | UV irradiation and deposition              | 25 at 1 Hz                       | -                                      | -                                      | 23   |

<sup>a</sup> charge storage capacity, <sup>b</sup> charge injection limit, <sup>c</sup> eutectic gallium–indium, <sup>d</sup> bi-layer lift-off resist, <sup>e</sup> graphene-fiber, <sup>f</sup> parylene-C, <sup>g</sup> silk fibroin, <sup>h</sup> gelatin methacryloyl, <sup>i</sup> alginate-polyacrylamide

## Reference

1. M. Heydari Gharahcheshmeh and K. K. Gleason, *Materials Today Advances*, 2020, **8**, 100086.
2. P. Sakunpongpitiporn, K. Phasukom and A. Sirivat, *Polym. Int.*, 2021.
3. B. Ji, C. Ge, Z. Guo, L. Wang, M. Wang, Z. Xie, Y. Xu, H. Li, B. Yang and X. Wang, *Biosens. Bioelectron.*, 2020, **153**, 112009.
4. C. Boehler, D. M. Vieira, U. Egert and M. Asplund, *ACS Appl. Mater. Interfaces*, 2020, **12**, 14855-14865.
5. K. Wang, C. L. Frewin, D. Esrafilzadeh, C. Yu, C. Wang, J. J. Pancrazio, M. Romero-Ortega, R. Jalili and G. Wallace, *Adv. Mater.*, 2019, **31**, 1805867.
6. Y. H. Cho, Y.-G. Park, S. Kim and J.-U. Park, *Adv. Mater.*, 2021, **33**, 2005805.
7. S. Zhao, G. Li, C. Tong, W. Chen, P. Wang, J. Dai, X. Fu, Z. Xu, X. Liu and L. Lu, *Nat. Commun.*, 2020, **11**, 1-12.
8. C. Kleber, K. Lienkamp, J. R uhe and M. Asplund, *Advanced Biosystems*, 2019, **3**, 1900072.
9. C. Boehler, T. Stieglitz and M. Asplund, *Biomaterials*, 2015, **67**, 346-353.
10. R. Dong, L. Wang, C. Hang, Z. Chen, X. Liu, L. Zhong, J. Qi, Y. Huang, S. Liu, L. Wang, Y. Lu and X. Jiang, *Small*, 2021, **17**, 2006612.
11. S. Park, Y. J. Song, H. Boo and T. D. Chung, *The Journal of Physical Chemistry C*, 2010, **114**, 8721-8726.
12. Y. H. Kim, G. H. Kim, N. S. Baek, Y. H. Han, A.-Y. Kim, M.-A. Chung and S.-D. Jung, *J. Micromech. Microeng.*, 2013, **23**, 097001.
13. Y. Lu, H. Lyu, A. G. Richardson, T. H. Lucas and D. Kuzum, *Sci. Rep.*, 2016, **6**, 1-9.
14. K. Wang, H. A. Fishman, H. Dai and J. S. Harris, *Nano Lett.*, 2006, **6**, 2043-2048.
15. F. Vitale, S. R. Summerson, B. Aazhang, C. Kemere and M. Pasquali, *ACS Nano*, 2015, **9**, 4465-4474.
16. R. Gerwig, K. Fuchsberger, B. Schroepfel, G. Link, G. Heusel, U. Kraushaar, W. Schuhmann, A. Stett and M. Stelzle, *Front. Neuroeng.*, 2012, **5**.
17. N. Chen, B. Luo, A. C. Patil, J. Wang, G. G. L. Gammad, Z. Yi, X. Liu, S. C. Yen, S. Ramakrishna and N. V. Thakor, *ACS Nano*, 2020, **14**, 8059-8073.
18. R. Gerwig, K. Fuchsberger, B. Schroepfel, G. S. Link, G. Heusel, U. Kraushaar, W. Schuhmann, A. Stett and M. Stelzle, *Front. Neuroeng.*, 2012, **5**, 8.
19. S. Venkatraman, J. Hendricks, Z. A. King, A. J. Sereno, S. Richardson-Burns, D. Martin and J. M. Carmena, *IEEE Trans. Neural Syst. Rehabil. Eng.*, 2011, **19**, 307-316.
20. Y. Lu, T. Li, X. Zhao, M. Li, Y. Cao, H. Yang and Y. Y. Duan, *Biomaterials*, 2010, **31**, 5169-5181.

21. J. Luo, Y. Xing, C. Sun, L. Fan, H. Shi, Q. Zhang, Y. Li, C. Hou and H. Wang, *Chem. Eng. J.*, 2022, **427**, 130886.
22. A. R. Spencer, A. Primbetova, A. N. Koppes, R. A. Koppes, H. Fenniri and N. Annabi, *ACS Biomater. Sci. Eng.*, 2018, **4**, 1558-1567.
23. L. Pan, P. Cai, L. Mei, Y. Cheng, Y. Zeng, M. Wang, T. Wang, Y. Jiang, B. Ji, D. Li and X. Chen, *Adv. Mater.*, 2020, **32**, 2003723.
